# Supplementary material for: Theories of God: Explanatory coherence in religious cognition
Source: PLOS journal article supplement (doi:10.1371/journal.pone.0209758), 2018-12-26
Supplement: S6 (10.1371/journal.pone.0209758.s006) [file journal.pone.0209758.s006]

**S6 Table. Responses to questions about suffering and misdeeds by theists and atheists, plus correlations between responses and anthropomorphization of God.**

| Response                                     | Mean    |          |            | Correlation |
|----------------------------------------------|---------|----------|------------|-------------|
|                                              | Theists | Atheists | Difference |             |
| <b>Suffering</b>                             |         |          |            |             |
| God is not omnipotent.                       | .30     | .80      | -.50***    | -.23***     |
| God is not omnibenevolent.                   | .25     | .74      | -.49***    | -.20**      |
| God uses suffering to teach/punish.          | .37     | .08      | .29***     | .11         |
| God allows suffering as part of larger plan. | .22     | .05      | .17***     | .21***      |
| <b>Misdeeds</b>                              |         |          |            |             |
| God is not omniscient.                       | .17     | .73      | -.56***    | -.30***     |
| God does not judge humans.                   | .21     | .72      | -.51***    | -.30***     |
| God gave humans free will.                   | .39     | .07      | .32***     | .19**       |
| God wants humans to learn from mistakes.     | .14     | .06      | .08*       | .15*        |

\* $p < .05$ , \*\* $p < .01$ , \*\*\* $p < .001$
